# Supplementary material for: IgG Suppresses Antibody Responses in Mice Lacking C1q, C3, Complement Receptors 1 and 2, or IgG Fc-Receptors
Source: PubMed Central journal article supplement (PMC4664261; doi:10.1371/journal.pone.0143841), 2015-11-30
Supplement: pone.0143841.s001.pdf [file pone.0143841.s001.pdf]

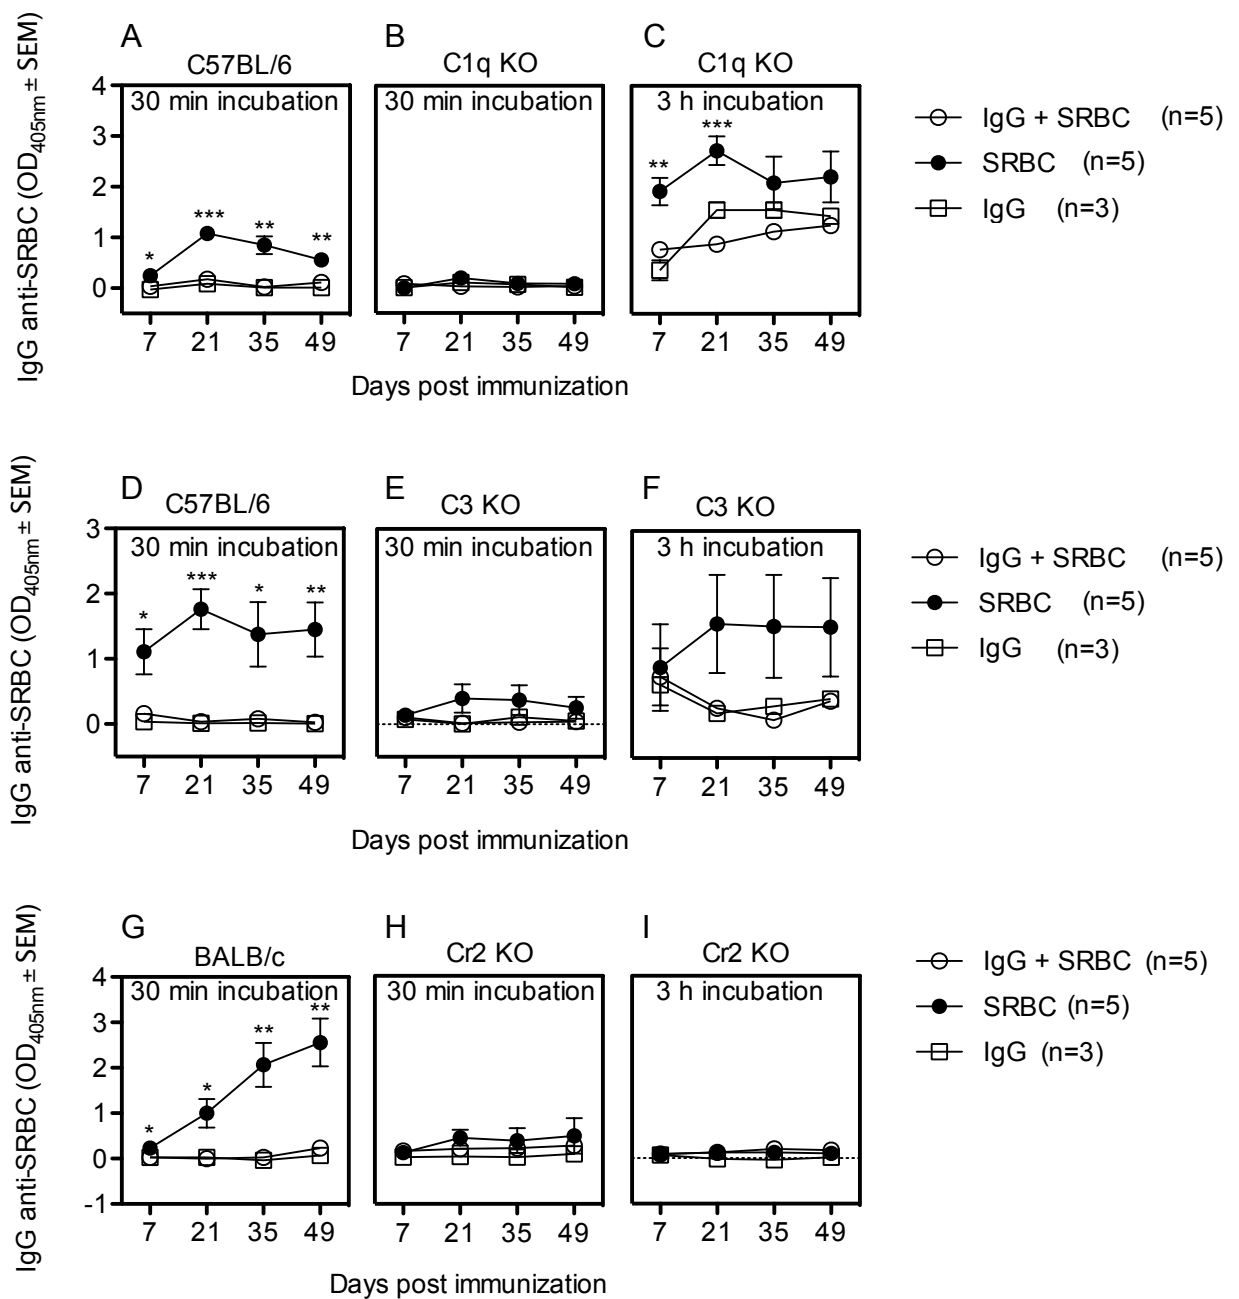

**S1 Fig. IgG-mediated suppression of primary IgG-responses in C1q KO, C3**

**KO and Cr2 KO mice.** C1q KO, C3 KO and C57BL/6 mice were immunized with 50  $\mu$ g IgG<sup>a</sup> anti-SRBC and  $5 \times 10^7$  SRBC,  $5 \times 10^7$  SRBC alone, or with 50  $\mu$ g IgG<sup>a</sup> alone. Cr2 KO and BALB/c mice immunized with 50  $\mu$ g IgG<sup>b</sup> anti-SRBC and  $5 \times 10^7$  SRBC,  $5 \times 10^7$  SRBC alone, or with 50  $\mu$ g IgG<sup>b</sup> alone. (A-I) Seven-49 days after immunization, serum levels of IgG anti-SRBC were assayed in ELISA on sera diluted 1:625 (A,B,D,E,G,H) or 1:25 (C,F,I). Data are representative of two (A-C), one (D-F), or two (G-I) experiments; (n=3-5/group in each experiment). p-values denote comparisons between mice immunized with IgG anti-SRBC together with SRBC and mice immunized with SRBC alone. ns, p > 0.05 (not indicated); \*, p < 0.05; \*\*, p < 0.01; \*\*\*, p < 0.001.
